# Supplementary material for: The effect of size and surface ligands of iron oxide nanoparticles on blood compatibility
Source: Royal Society of Chemistry journal article supplement (doi:10.1039/c9ra10969b), 2020-01-01
Supplement: c9ra10969b1.pdf [file c9ra10969b1.pdf]

## The effect of size and surface ligands of iron oxide nanoparticles on blood compatibility

Tao Liu<sup>ab,†</sup>, Ru Bai<sup>a, †</sup>, Huige Zhou<sup>a,\*</sup>, Rongqi Wang<sup>c</sup>, Jing Liu<sup>ad</sup>, Yuliang Zhao<sup>ab</sup>,  
Chunying Chen<sup>ab,\*</sup>

<sup>a</sup> CAS Key Laboratory for Biomedical Effects of Nanomaterials and Nanosafety & CAS Center for Excellence in Nanoscience, National Center for Nanoscience and Technology, Chinese Academy of science, No. 11 Beiyitiao, Zhongguancun, Beijing 100190, China. E-mail: [chenchy@nanoctr.cn](mailto:chenchy@nanoctr.cn) or [zhouhg@nanoctr.cn](mailto:zhouhg@nanoctr.cn); Fax: +86-10-62656765; Tel: +86 10 8254 5560

<sup>b</sup> University of Chinese Academy of Sciences, Beijing 100049, P. R. China

<sup>c</sup> Department of Clinical Laboratory, Beijing Haidian Hospital, Haidian section of Peking University Third Hospital, Beijing 100080, China.

<sup>d</sup> Faculty of Life Sciences & Medicine, Northwest University (NWU), Xi'an 710069, China

† Tao Liu and Ru Bai contributed equally to this work.

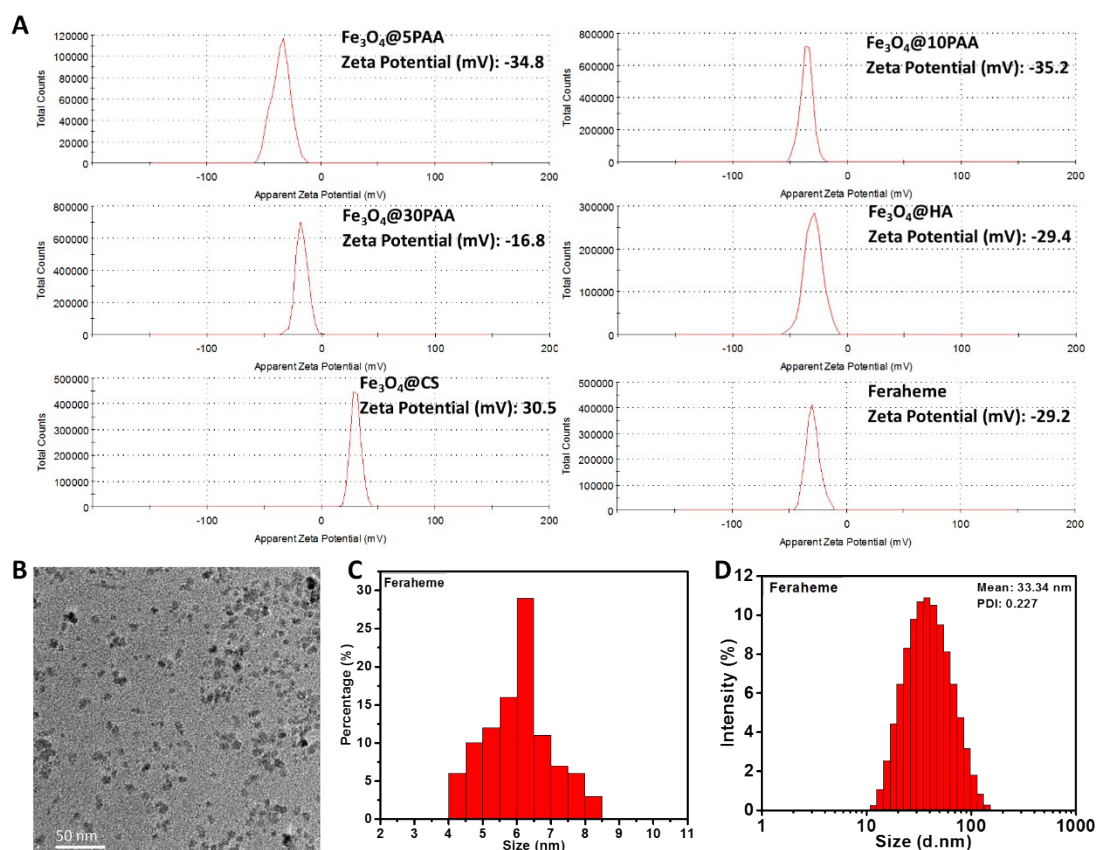

Figure S1. (A) The zeta potential distribution of SPIONs. The size characterization of Feraheme, (B) TEM image; (C) size distribution; (D) hydrodynamic size.

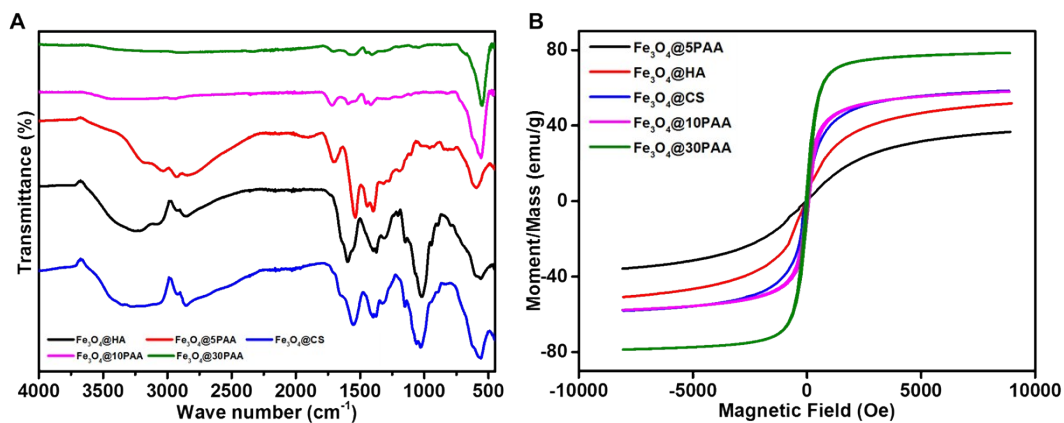

Figure S2. Characterizations of FTIR spectrum and magnetic property of Superparamagnetic iron oxide nanoparticles. (A) FTIR spectrum of SPIONs. (B) Field-dependent magnetization curve of SPIONs at room temperature.

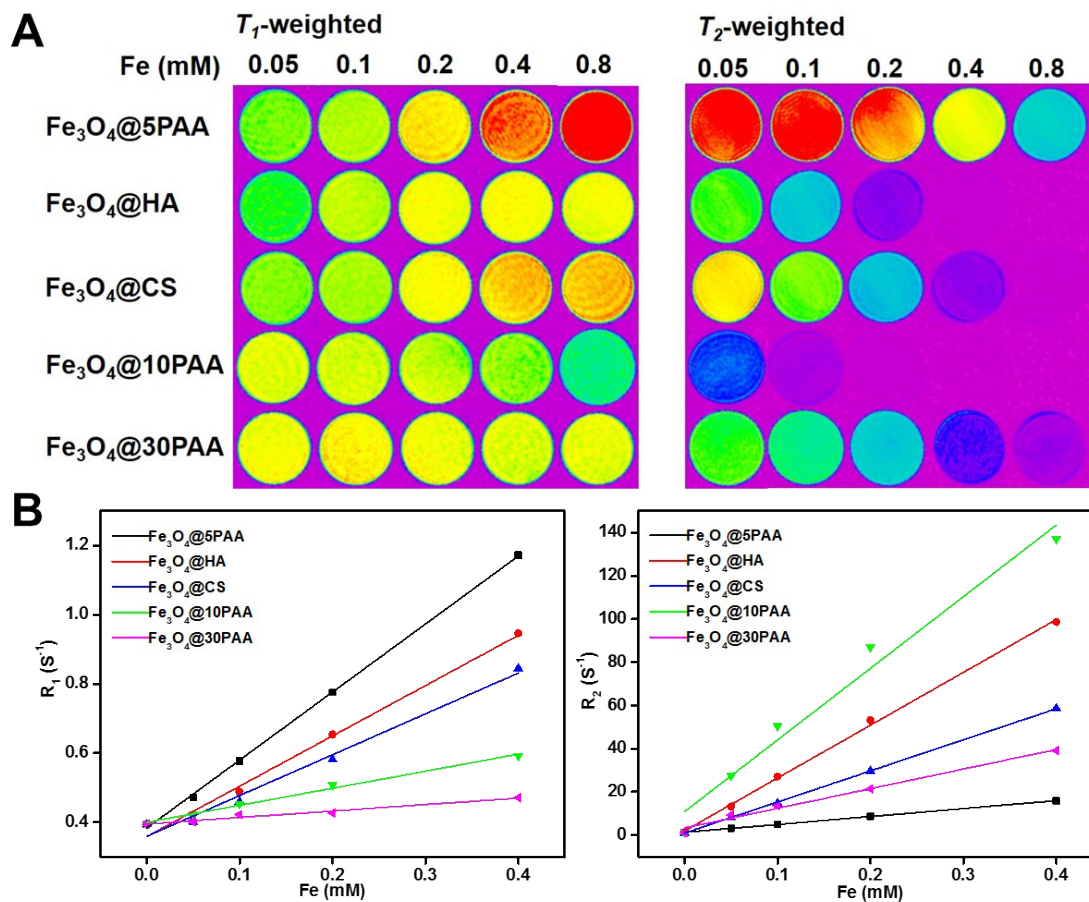

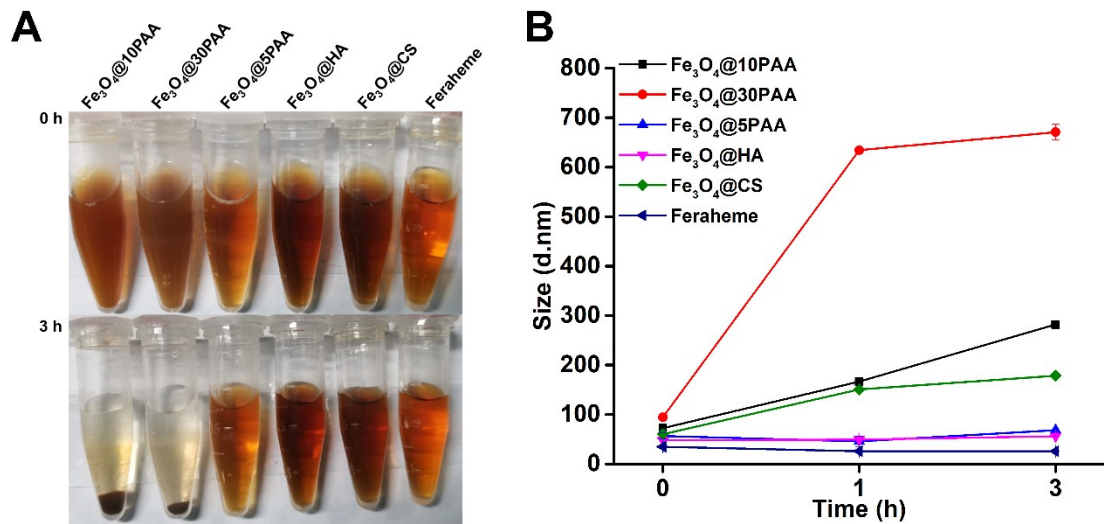

Figure S4. (A) The picture of SPIONs in PBS solution at 0 and 3 h. (B) The hydrodynamic size of SPIONs in PBS solution at 0, 1 and 3h (n = 3).

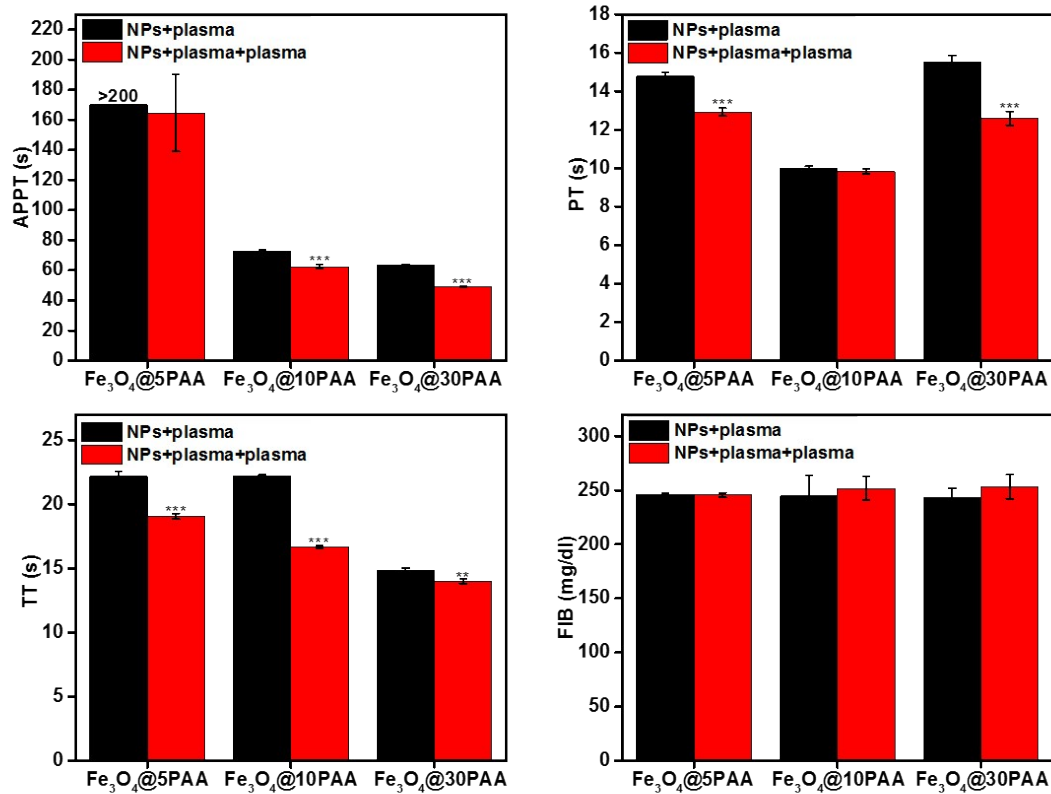

Figure S5. The results of four coagulation tests after addition of healthy plasma into the abnormal plasma treated by Fe<sub>3</sub>O<sub>4</sub>@5PAA at the concentration of 5 mg/mL. \*\* $P < 0.01$  and \*\*\* $P < 0.001$ .
